## JB Review

# Regulation of bone and cartilage development by network between BMP signalling and transcription factors

Received December 9, 2011; accepted January 9, 2012; published online January 16, 2012

**Riko Nishimura\*, Kenji Hata,  
Takuma Matsubara, Makoto Wakabayashi  
and Toshiyuki Yoneda**

Department of Molecular and Cellular Biochemistry,  
Osaka University Graduate School of Dentistry

\*Riko Nishimura, 1-8 Yamadaoka, Suita, Osaka 565-0871, Japan.  
Tel: +81 6 6879 2887, Fax: +81 6 6879 2890,  
email: rikonisi@dent.osaka-u.ac.jp

**Bone morphogenetic protein(s) (BMP) are very powerful cytokines that induce bone and cartilage formation. BMP also stimulate osteoblast and chondrocyte differentiation. During bone and cartilage development, BMP regulates the expression and/or the function of several transcription factors through activation of Smad signalling. Genetic studies revealed that Runx2, Osterix and Sox9, all of which function downstream of BMP, play essential roles in bone and/or cartilage development. In addition, two other transcription factors, Msx2 and Dlx5, which interact with BMP signalling, are involved in bone and cartilage development. The importance of these transcription factors in bone and cartilage development has been supported by biochemical and cell biological studies. Interestingly, BMP is regulated by several negative feedback systems that appear necessary for fine-tuning of bone and cartilage development induced by BMP. Thus, BMP harmoniously regulates bone and cartilage development by forming network with several transcription factors.**

*Keywords:* BMP/bone/cartilage/transcription factors.

*Abbreviations:* BMP, Bone morphogenetic protein(s); OSE2, osteoblast-specific element 2; PTH, parathyroid hormone; PTHrP, PTH-related protein; Ihh, Indian hedgehog; ER, endoplasmic reticulum.

In mammals, bone is formed in two fundamentally different ways: membranous ossification or endochondral ossification (1–4). During membranous ossification, multipotent undifferentiated mesenchymal cells sequentially differentiate into preosteoblasts, osteoblasts and osteocytes, which form bone tissue (2, 4). In contrast, endochondral ossification is apparently more complex than membranous ossification. During endochondral ossification, multipotent undifferentiated mesenchymal cells differentiate into proliferative chondrocytes, prehypertrophic chondrocytes and hypertrophic chondrocytes; subsequently, the cartilage tissues formed by these chondrocytes are replaced by

bone tissues (1, 5). Bone morphogenetic protein(s) (BMP), especially BMP2 and BMP4, are very powerful growth factors that induce bone and cartilage formation by stimulating osteoblast differentiation and chondrocyte differentiation (4). Smad signalling plays a central role in BMP signalling; the details of BMP–Smad signalling are described in excellent literatures (6–9). As expected, BMP receptors are required for bone development (10). Furthermore, BMP-regulated R-Smad, Smad1, Smad5 and Smad8, and co-Smad, Smad4, all play critical roles as transcriptional regulators in osteoblastogenesis and chondrogenesis (11–13). However, the Smad proteins and BMP receptors are ubiquitously expressed in several tissues; therefore, it is difficult to conceive of regulatory models for osteoblastogenesis and chondrogenesis that involve only BMP–Smad signalling. Genetic evidence and biochemical studies indicate that several transcription factors, including Runx2, Osterix, Msx2, Dlx5/6 and Sox9, are essential for osteoblastogenesis and chondrogenesis (4). Importantly, expression and/or function of these transcription factors are controlled by BMP–Smad signalling. In this review, we describe recent advances in our understanding of the network formed by BMP and Smad signalling components and several transcription factors.

## Partnership between BMP–Smad Signalling and Runx2 during Osteoblast Differentiation

Runx2 (also called Cbfa1, Pepb2 $\alpha$ 1 or AML3) is an essential transcription factor, which belongs to the Runx family, for bone formation and osteoblast differentiation as described in the followings (3). Mutations in the human *RUNX2* gene cause cleidocranial dysplasia, which is characterized by impairment of bone formation in calvariae and clavicle (14). The *Runx2* knockout mice show no bone formation and osteoblastogenesis (15, 16). Furthermore, Runx2 has been identified as a transcription factor that binds to the osteoblast-specific element 2 (OSE2) present in the promoter of the osteocalcin gene (17). In addition, overexpression of Runx2 in multipotent mesenchymal cells induces osteoblast differentiation *in vitro* (18). These findings indicate that Runx2 may interact with BMP–Smad signalling because Smad proteins function in nuclei, and as expected, Runx2 expression is up-regulated by activation of BMP–Smad signalling (18, 19). Moreover, Runx2 can physically associate with activated Smad1 and Smad5 and to cooperatively stimulate osteoblast differentiation with Smad1 and Smad5 (18, 20). An interaction between Runx2 and Smad protein is involved in pathogenesis of

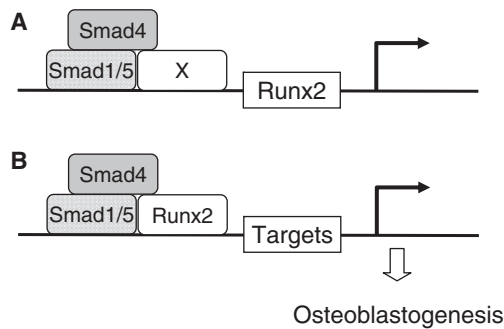

**Fig. 1** Activated Smad1/5 and Smad4 regulate Runx2 expression (A), and subsequently, associate with Runx2 to regulate target genes necessary for osteoblastogenesis (B). An unidentified transcription factor (X) is implicated in BMP-mediated induction of Runx2.

cleidocranial dysplasia (21). Collectively, activation of BMP–Smad signalling stimulates bone formation and osteoblastogenesis via up-regulating both the expression and the function of Runx2. C/EBP $\beta$ , a transcription factor critical for the initial step in adipocyte differentiation, has been identified as one of the co-activators for Runx2 during osteoblast differentiation (22). In addition, expression of C/EBP $\beta$  was up-regulated by BMP2 treatment (22). Interestingly, LIP, an isoform of C/EBP $\beta$  that lacks the transcriptional activation domain, appears to function as a switching regulator between osteoblastogenesis and adipogenesis (22). In contrast, CHOP, another member of the C/EBP transcription factor family, is up-regulated by BMP2 and inhibits osteoblastogenesis in a dominant negative fashion (23). Thus, BMP–Smad signalling controls osteoblast differentiation through Runx2 via several mechanisms (Fig. 1).

### Regulation of Osteoblast Differentiation by Osterix

A Sp1 family member, Osterix (also called Sp7), was identified as a BMP2-specific transcription factor following the discovery of the essential role of Runx2 in bone formation (24). Importantly, Osterix knockout mice showed severe impairment of bone formation and osteoblastogenesis (24), indicating that Osterix is also an essential transcription factor for bone development. Interestingly, Runx2 expression was up-regulated in Osterix knockout mice, but no expression of Osterix in Runx2 knockout mice (25); taken together, these findings indicate that Runx2 acts up-stream of Osterix. This scenario was confirmed by the observation that overexpression of Runx2 induces Osterix expression (25). In addition, Smad signalling is necessary for induction of Osterix by BMP2 (25). However, Msx2, a homeobox family member, is involved in regulation of Osterix expression, at least *in vitro*, because BMP2 treatment or Msx2 overexpression increased Osterix expression in mesenchymal cells isolated from Runx2 knockout mice (25). Therefore, regulation of Osterix expression during osteoblast differentiation is apparently complex (Fig. 2). Runx2 and Osterix seem to share a particular osteogenic function because both up-regulate expression of the same

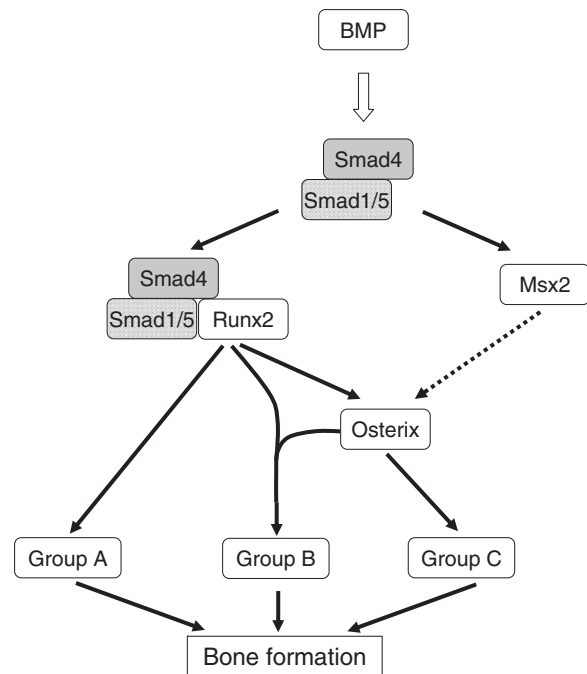

**Fig. 2** Runx2 and Msx2 induce Osterix in conjunction with Smad signalling. Runx2 may be more dominant than Msx2 in this induction. Runx2 and Osterix regulate common (Group B) and different (Groups A and C) target genes, all of which could be necessary for bone formation.

osteoblast marker genes (*e.g.* *osteocalcin* and *Bsp*). However, Runx2 and Osterix also up-regulate different osteoblastogenic genes (25). Therefore, it is likely that Runx2 and Osterix have both common and distinct functions during osteoblast differentiation (Fig. 2).

### Role of other BMP2-Regulated Transcription Factors in Osteoblast Differentiation

Several transcription factors other than Runx2 and Osterix are regulated by BMP2 and are involved in osteoblast differentiation. Msx2 expression is a marker of the early response to BMP2 activity. Initially, Msx2 was thought to be a repressor and inhibitory regulator of osteoblast differentiation, because some data indicated that Msx2 inhibited activity of the osteocalcin gene promoter (26, 27). However, subsequent *in vivo* genetic studies refuted these conclusions. First, bone formation was dramatically inhibited in Msx2 knockout mice (28). Secondly, functional haploinsufficiency of the human *MSX2* causes defects in skull ossification (29). Likewise, mutations in the *MSX2* gene were identified in the patients with foramina parietalia permagna (30). Moreover, overexpression of Msx2 consistently stimulates osteoblast differentiation of mesenchymal cells *in vitro* (31, 32). As described above, Msx2 is also implicated in up-regulation of Osterix expression (25, 31). Thus, Msx2 is an important transcriptional regulator of bone development. Interestingly, Msx2 may function as a regulator, which defines the balance between osteoblastogenesis and adipogenesis (31, 32). The inhibitory role of Msx2 in adipogenesis has been

shown *in vivo* (33). Although, the precise molecular mechanisms that cause *Msx2* to have reciprocal roles in osteoblast differentiation and adipocyte differentiation are still unclear, *Msx2* might function in the early stage of mesenchymal cell differentiation in response to BMP2.

A *Dlx* family homeobox gene, *Dlx5*, is also up-regulated by BMP2 treatment (4). *Dlx5* knockout mice have impaired skeletal development and particularly impaired craniofacial development. Among the *Dlx* family genes, *Dlx6* shows the highest similarity to *Dlx5*. *Dlx6* knockout mice, like *Dlx5* knockout mice (34), have abnormalities in skeletogenesis (35, 36). Of note, double knockout mice of *Dlx5* and *Dlx6* showed more severe impairment of bone development than the single knockout mice of the each (35). Interestingly, the *Dlx5* and *Dlx6* genes are linked and reside at the same locus and form a bigene cluster; it is likely that expression of *Dlx5* and *Dlx6* is regulated by the same or similar mechanisms. Thus, the transcription factors *Dlx5* and *Dlx6* mediate the osteogenic role of BMP.

### Negative Feedback Regulation Involving BMP during Osteoblast Differentiation

An inhibitory Smad, Smad6, is up-regulated following BMP2 stimulation (37). As expected, overexpression of Smad6 markedly inhibited osteoblastogenic function of BMP2 (18). This finding indicates that BMP may prevent excessive osteoblast differentiation by controlling Smad6 expression. In addition to a central negative feedback mechanism that involves Smad6, BMP signalling appears to have additional effects that fine tune osteoblastogenesis. For example, a HECT-type E3 ubiquitin ligase, Smurf1, plays a major role in regulating the expression levels of R-Smad proteins through its association with Smad1, Smad5 and presumably Smad8 (38). Furthermore, Smurf1 is involved in the degradation of the BMP receptor and Runx2 (38, 39). Interestingly, a report indicated that Smurf1 regulates osteoblastogenic activity and bone volume via MEKK2 (40). Smad6 is involved in the degradation of Smad proteins and BMP receptors by Smurf1 (38, 41). Tob, an antiproliferative protein, can inhibit osteoblastogenesis and bone formation through physical interaction with BMP regulated R-Smad (42). Tob knockout mice consistently exhibit higher bone volumes than wild-type mice (42). Therefore, it is likely that Tob is an important negative regulator in BMP-dependent bone formation. Hey1, which mediates Notch signalling, is also up-regulated by BMP2 in mesenchymal cells and osteoblasts (43, 44). Hey1 inhibits osteoblast differentiation by suppressing Runx2 activity (43, 45), indicating that a BMP–Hey1 loop also functions in a negative feedback system that tempers the osteoblastogenic action of BMP2. Because SnoN and c-Ski form a complex with Smad and recruits N-CoR and/or HDAC (46–49), these factors may participate in the negative regulation of BMP-mediated osteoblast development.

Although it is still unknown how these systems of negative feedback regulation integrate with the larger BMP-related network during osteoblast differentiation, this regulation would be necessary for harmonious regulation of BMP-mediated bone formation.

### Role of TGF- $\beta$ Signalling in Osteoblast Differentiation

TGF- $\beta$  is a very abundant protein in bone; consequently, several investigators have been interested in the role of TGF- $\beta$  in osteoblast differentiation. Furthermore, BMP belongs to the TGF- $\beta$  family (6, 50, 51), which is reported to stimulate osteoblast differentiation (52). Moreover, TGF- $\beta$ -regulated R-Smad, Smad3 was reported to play a role in osteoblast differentiation (53). However, the role of TGF- $\beta$  and Smad3 in osteoblastogenesis has been getting controversial. TGF- $\beta$  strongly inhibits osteoblast differentiation of mesenchymal cells (54), and treatment with TGF- $\beta$  inhibitor dramatically stimulates osteoblast differentiation (54, 55). Finally, Smad3 clearly associates with Runx2 to block the osteoblastogenic action of Runx2 (56). At the present time, we conclude that TGF- $\beta$  has inhibitory effects on osteoblast differentiation. Recently, it has been shown that TGF- $\beta$  recruits mesenchymal cells to bone remodelling regions (57). In addition, a novel paradigm indicates that TGF- $\beta$  stimulates the association of TGF- $\beta$  receptor complex with the parathyroid hormone (PTH) receptor, and phosphorylation of the PTH receptor has been reported (58). These studies seem very interesting and attractive; however, it may be necessary to confirm these findings using other appropriate experimental systems, because the role of TGF- $\beta$  in bone metabolism is still elusive.

### Molecular Mechanisms of Regulation of Endochondral Ossification by Sox9

As described above, BMP plays an important role in cartilage development and chondrocyte differentiation (1, 4, 41). Genetic studies indicate that Sox9 is a transcription factor that is essential for chondrogenesis. Mutations of the *SOX9* genes lead to Campomelic dysplasia, which is characterized by severe chondrodysplasia and sex reversal (59, 60). Conditional Sox9 knockout mice in chondrocyte lineage show no chondrogenesis (61). In addition, Sox9 has been shown to directly regulate chondrogenic genes, such as *Col2a1*, *Col11a2* and *aggrecan* (4). Although BMP-mediated regulation of Sox9 expression has not been demonstrated yet, we observed that BMP2 markedly stimulated Sox9 expression in mouse limb bud cells (R. Nishimura, unpublished results). Therefore, it is likely that BMP controls chondrogenesis through Sox9. Sox9 is also necessary for induction of Sox5 and Sox6 (61, 62). Mice lacking both Sox5 and Sox6 exhibit severe impairment of chondrogenesis (63). In addition, overexpression of Sox9, Sox5 and Sox6

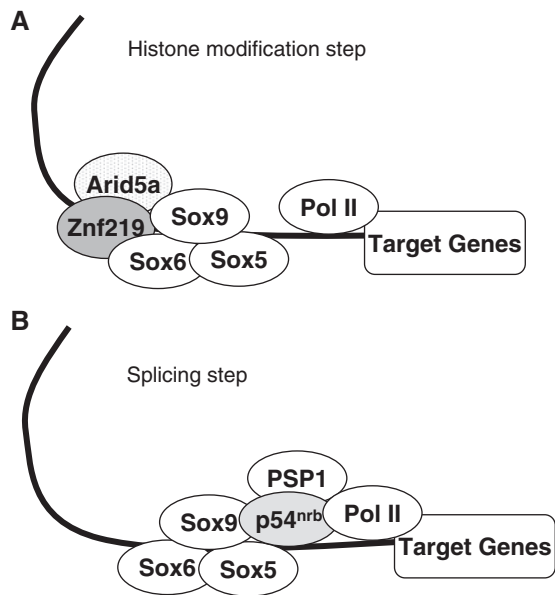

**Fig. 3** Sox9 assembles distinct transcriptional complexes to regulate chondrogenic target genes. (A) Arid5a and Znf219 are involved in the histone modification step. (B) Paraspeckle protein, p54<sup>nrB</sup>, is necessary for linking the transcription and splicing steps.

together induces chondrocyte differentiation more efficiently than overexpression of Sox9 alone (62, 64). Thus, Sox9 controls chondrocyte development in cooperation with Sox5 and Sox6. We were interested in identifying transcriptional partners of Sox9 and/or up-stream regulators of Sox9. Therefore, we developed a mammalian expression cloning system using a Col2a1 gene luciferase construct to identify such factors and isolated TRPV4 (65), which is up-stream of Sox9. Genetic studies confirm that our cloning system was very powerful and useful, because mutations in the TRPV4 gene cause genetic conditions that are accompanied by chondrodysplasia (66, 67). Using this system, we identified several transcriptional partners of Sox9; for example, p54<sup>nrB</sup>, a component of para-speckled body, associates with Sox9 and stimulates its transcriptional activity (68). Interestingly, a p54<sup>nrB</sup> mutation inhibited Sox9-induced splicing of Col2a1 mRNA and suppressed chondrogenesis *in vivo* (68). Collectively, these data indicate that p54<sup>nrB</sup>, as a partner of Sox9, links transcription to splicing (68) (Fig. 3B). Znf219 and Arid5a, which physically interact with each other, also associate and co-localize with Sox9 (62, 69); however, they have a nuclear localization pattern that is distinct from the nuclear localization pattern of p54<sup>nrB</sup> (R. Nishimura, unpublished results). These findings indicate that Znf219 and Arid5a have a different function from that of p54<sup>nrB</sup>. In fact, Arid5a-stimulated acetylation of histone 3 around the Col2a1 gene promoter region (69). Therefore, Znf219 and Arid5a seem to be implicated in histone modification during Sox9-mediated chondrogenesis (Fig. 3A). Taken together, these findings indicate that Sox9 spatially and temporally regulates chondrogenesis by forming different transcriptional complexes at distinct stages (Fig. 3).

## Role of Sox9 in the Late Stage of Chondrogenesis

As described above, Sox9 is essential for chondrogenesis, especially in the early stages, including during condensation of mesenchymal cells and differentiation of mesenchymal cells into chondrocytes. However, Sox9 can apparently inhibit late stages of chondrogenesis; for example, overexpression of Sox9 induces PTH-related protein (PTHrP), which inhibits maturation of chondrocytes, and Sox9 inhibits hypertrophic conversion of chondrocytes (70). Interestingly, treatment with a neutralizing anti-PTHrP antibody restores hypertrophic conversion by Sox9 in metatarsal bone cultures (70). These results indicate that Sox9 inhibits late stages of chondrogenesis by up-regulating PTHrP. It is well known that Indian hedgehog (Ihh) stimulates PTHrP expression; therefore, the relationship between Sox9 and Ihh signalling was investigated. Notably, Sox9 associates with Gli2, a mediator of Ihh, and Sox9 and Gli2 co-operatively stimulate PTHrP expression and PTHrP gene promoter activity (70). Sox9 has also been shown to inhibit late stages of chondrogenesis by suppressing cartilage vascularization *in vivo* (71). Thus, Sox9 negatively regulates the late stages of chondrogenesis through multiple distinct mechanisms.

## Regulation of Chondrogenesis by other Transcription Factors

Runx2 and Runx3 are necessary for hypertrophy of chondrocytes because mice lacking both Runx2 and Runx3 showed no hypertrophic conversion of chondrocytes (72). Runx2 expression is higher than Runx3 expression, and a Runx2 deficiency in mice results in a more severe cartilage defect than does a Runx3 deficiency (72). Runx2 is likely to be more predominant for hypertrophy of cartilage than Runx3. Interestingly, Runx2 has been shown to induce hypertrophy of chondrocytes in collaboration with Ihh (72). To support this finding, Runx2 has been shown to physically associate with Gli2 during osteoblast differentiation (73). However, the idea seems inconsistent with effect Ihh has on the induction of PTHrP, which inhibits hypertrophic conversion of cartilage. This apparent contradiction was resolved by experiments in which treatment with Ihh-stimulated hypertrophy and calcification of chondrocytes (74). Overexpression of Msx2 also consistently stimulates maturation of chondrocytes (74). In addition, cartilage development seems to be reduced in Msx2 knockout mice (28). Although the relationship between Msx2 and Runx2 is still unclear, the dual role of Ihh in chondrocytes differentiation might depend on the relative dosages of Runx2 and Sox9, because Runx2 stimulates and Sox9 inhibits maturation of chondrocytes. Recently, we found that Osterix is expressed in the prehypertrophic zones of growth plates and that, in global and conditional Osterix knockout mice, chondrogenesis was totally blocked at the hypertrophic stage and there was no evidence of calcification of chondrogenic matrices or formation of matrix vesicles

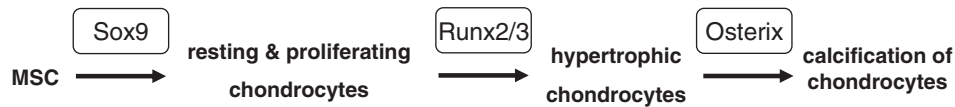

Fig. 4 Essential roles of the Sox9-Runx2/3-Osterix axis in endochondral ossification. MSC, mesenchymal stem cells.

(R. Nishimura, unpublished results). It is, therefore, likely that a Sox9-Runx2/Runx3-Osterix axis is a central transcriptional pathway in endochondral ossification (Fig. 4).

### Effects of Endoplasmic Reticulum Stress on Bone and Cartilage Development

Accumulation of unfolded or misfolded proteins in the endoplasmic reticulum (ER) is associated with gene mutation, viral infection, inflammation or chemical toxicity; this accumulation leads to ER stress, and subsequently causes apoptosis of the cells. When cells experience ER stress, several ER sensors, including IRE1, ATF6, Perk, Oasis and BBF2H7, all of which are anchored in the membrane of the ER, are released by membrane truncation, and subsequently respond to the ER stress (75). Interestingly, truncated forms of Oasis and BBF2H7 translocate to nuclei and function as transcription factors. Moreover, Oasis and BBF2H7 are very critical for bone and cartilage development, respectively (76, 77). In Oasis knockout mice, misfolded type I collagen protein accumulate to high levels in the impaired ER (76). Importantly, the Oasis knockout mice showed impaired osteogenesis and a reduction in expression of type I collagen (76). Biochemical experiments showed that Oasis regulates *Coll1a1* expression via direct binding to the *Coll1a1* gene promoter (76). The phenotype seen in Oasis knockout mice was almost rescued when knockout mice were mated with transgenic mice overexpressing Oasis (78). Therefore, Oasis might regulate bone development, at least in part, by controlling *Coll1a1*. BBF2H7 knockout mice showed severe chondrodysplasia (77). Microarray experiments revealed that Sec23 is a major target of BBF2H7 in chondrocytes (77). As expected, introduction of Sec23, an important chaperon protein for protein folding, rescued chondrocyte differentiation in BBF2H7-deficient cells (77). Because bone and cartilage produce and secrete large amounts of bone and cartilage matrix components, respectively, moderate and appropriate levels of ER stress occur under normal developmental and physiological conditions in osteoblasts and chondrocytes. Thus, Oasis and BBF2H7 would be required for balance and maintenance of ER stress in bone and cartilage development, respectively.

### Conclusion

In the last decade, our understanding of the molecular mechanisms by which BMP regulate osteogenesis and chondrogenesis via several critical transcription factors progressed substantially as the investigations of BMP signalling advanced. In particular, genetic

investigations and biochemical studies have contributed to these advances. However, several important issues have yet to be resolved. First, it is not yet clear how BMP-related transcription factors interact with one another to form the spatial-temporal network that regulates bone and cartilage development. Secondly, it is unknown which transcription factor(s) is involved in the induction of Runx2 and Sox9 (Fig. 1). Thirdly, further understanding of transcriptional complexes assembled by Runx2 and Osterix is necessary. Last, the target genes that are regulated by Runx2 and Osterix and that have essential roles in bone formation have not been identified; however, although the mechanisms by which Sox9 regulates the target genes critical for endochondral ossification are well established. We believe a better understanding of these unresolved issues will contribute to the development of BMP as therapeutic agents for treatment of bone and cartilage diseases.

### Funding

Ministry of Education, Science, Sports and Culture Grants-in-Aid for Scientific Research (partial); The Uehara Memorial Foundation (partial); The Astellas Foundation for Research on Metabolic Disorders (partial).

### Conflict of interest

None declared.

### References

1. Kronenberg, H.M. (2003) Developmental regulation of the growth plate. *Nature* **423**, 332–336
2. Karsenty, G. (2003) The complexities of skeletal biology. *Nature* **423**, 316–318
3. Komori, T. (2011) Signaling networks in RUNX2-dependent bone development. *J. Cell. Biochem.* **112**, 750–755
4. Nishimura, R., Hata, K., Ikeda, F., Ichida, F., Shimoyama, A., Matsubara, T., Wada, M., Amano, K., and Yoneda, T. (2008) Signal transduction and transcriptional regulation during mesenchymal cell differentiation. *J. Bone Miner. Metab.* **26**, 203–212
5. de Crombrughe, B., Lefebvre, V., Behringer, R.R., Bi, W., Murakami, S., and Huang, W. (2000) Transcriptional mechanisms of chondrocyte differentiation. *Matrix Biol.* **19**, 389–394
6. Heldin, C.H., Miyazono, K., and ten Dijke, P. (1997) TGF-beta signalling from cell membrane to nucleus through SMAD proteins. *Nature* **390**, 465–471
7. Miyazono, K., Maeda, S., and Imamura, T. (2005) BMP receptor signaling: transcriptional targets, regulation of signals, and signaling cross-talk. *Cytokine Growth Factor Rev.* **16**, 251–263
8. Massagué, J., Seoane, J., and Wotton, D. (2005) Smad transcription factors. *Genes Dev.* **19**, 2783–2810

9. Miyazono, K., Kamiya, Y., and Morikawa, M. (2010) Bone morphogenetic protein receptors and signal transduction. *J. Biochem.* **147**, 35–51
10. Zhao, M., Harris, S.E., Horn, D., Geng, Z., Nishimura, R., Mundy, G.R., and Chen, D. (2002) Bone morphogenetic protein receptor signaling is necessary for normal murine postnatal bone formation. *J. Cell Biol.* **157**, 1049–1060
11. Nishimura, R., Kato, Y., Chen, D., Harris, S.E., Mundy, G.R., and Yoneda, T. (1998) Smad5 and DPC4 are key molecules in mediating BMP-2-induced osteoblastic differentiation of the pluripotent mesenchymal precursor cell line C2C12. *J. Biol. Chem.* **273**, 1872–1879
12. Kawai, S., Faucheu, C., Gallea, S., Spinella-Jaegle, S., Atfi, A., Baron, R., and Roman, S.R. (2000) Mouse smad8 phosphorylation downstream of BMP receptors ALK-2, ALK-3, and ALK-6 induces its association with Smad4 and transcriptional activity. *Biochem. Biophys. Res. Commun.* **271**, 682–687
13. Fujii, M., Takeda, K., Imamura, T., Aoki, H., Sampath, T.K., Enomoto, S., Kawabata, M., Kato, M., Ichijo, H., and Miyazono, K. (1999) Roles of bone morphogenetic protein type I receptors and Smad proteins in osteoblast and chondroblast differentiation. *Mol. Biol. Cell* **10**, 3801–3813
14. Mundlos, S., Otto, F., Mundlos, C., Mulliken, J.B., Aylsworth, A.S., Albright, S., Lindhout, D., Cole, W.G., Henn, W., Knoll, J.H., Owen, M.J., Mertelsmann, R., Zabel, B.U., and Olsen, B.R. (1997) Mutations involving the transcription factor CBFA1 cause cleidocranial dysplasia. *Cell* **89**, 773–779
15. Komori, T., Yagi, H., Nomura, S., Yamaguchi, A., Sasaki, K., Deguchi, K., Shimizu, Y., Bronson, R.T., Gao, Y.H., Inada, M., Sato, M., Okamoto, R., Kitamura, Y., Yoshiki, S., and Kishimoto, T. (1997) Targeted disruption of Cbfa1 results in a complete lack of bone formation owing to maturational arrest of osteoblasts. *Cell* **89**, 755–764
16. Otto, F., Thornell, A.P., Crompton, T., Denzel, A., Gilmour, K.C., Rowsewell, I.R., Stamp, G.W., Beddington, R.S., Mundlos, S., Olsen, B.R., Selby, P.B., and Owen, M.J. (1997) Cbfa1, a candidate gene for cleidocranial dysplasia syndrome, is essential for osteoblast differentiation and bone development. *Cell* **89**, 765–771
17. Ducy, P., Zhang, R., Geoffroy, V., Ridall, A.L., and Karsenty, G. (1997) Osf2/Cbfa1: a transcriptional activator of osteoblast differentiation. *Cell* **89**, 747–754
18. Nishimura, R., Hata, K., Harris, S.E., Ikeda, F., and Yoneda, T. (2002) Core-binding factor alpha 1 (Cbfa1) induces osteoblastic differentiation of C2C12 cells without interactions with Smad1 and Smad5. *Bone* **31**, 303–312
19. Lee, K.S., Kim, H.J., Li, Q.L., Chi, X.Z., Ueta, C., Komori, T., Wozney, J.M., Kim, E.G., Choi, J.Y., Ryoo, H.M., and Bae, S.C. (2000) Runx2 is a common target of transforming growth factor beta1 and bone morphogenetic protein 2, and cooperation between Runx2 and Smad5 induces osteoblast-specific gene expression in the pluripotent mesenchymal precursor cell line C2C12. *Mol. Cell. Biol.* **20**, 8783–8792
20. Hanai, J., Chen, L.F., Kanno, T., Ohtani-Fujita, N., Kim, W.Y., Guo, W.H., Imamura, T., Ishidou, Y., Fukuchi, M., Shi, M.J., Stavnezer, J., Kawabata, M., Miyazono, K., and Ito, Y. (1999) Interaction and functional cooperation of PEBP2/CBF with Smads. Synergistic induction of the immunoglobulin germline Calpha promoter. *J. Biol. Chem.* **274**, 31577–31582
21. Zhang, Y.W., Yasui, N., Ito, K., Huang, G., Fujii, M., Hanai, J., Nogami, H., Ochi, T., Miyazono, K., and Ito, Y. (2000) A RUNX2/PEBP2alpha A/CBFA1 mutation displaying impaired transactivation and Smad interaction in cleidocranial dysplasia. *Proc. Natl Acad. Sci. USA* **97**, 10549–10554
22. Hata, K., Nishimura, R., Ueda, M., Ikeda, F., Matsubara, T., Ichida, F., Hisada, K., Nokubi, T., Yamaguchi, A., and Yoneda, T. (2005) A CCAAT/enhancer binding protein beta isoform, liver-enriched inhibitory protein, regulates commitment of osteoblasts and adipocytes. *Mol. Cell. Biol.* **25**, 1971–1979
23. Shirakawa, K., Maeda, S., Gotoh, T., Hayashi, M., Shinomiya, K., Ehata, S., Nishimura, R., Mori, M., Onozaki, K., Hayashi, H., Uematsu, S., Akira, S., Ogata, E., Miyazono, K., and Imamura, T. (2006) CCAAT/enhancer-binding protein homologous protein (CHOP) regulates osteoblast differentiation. *Mol. Cell. Biol.* **26**, 6105–6116
24. Nakashima, K., Zhou, X., Kunkel, G., Zhang, Z., Deng, J.M., Behringer, R.R., and de Crombrughe, B. (2002) The novel zinc finger-containing transcription factor osterix is required for osteoblast differentiation and bone formation. *Cell* **108**, 17–29
25. Matsubara, T., Kida, K., Yamaguchi, A., Hata, K., Ichida, F., Meguro, H., Aburatani, H., Nishimura, R., and Yoneda, T. (2008) BMP2 regulates Osterix through Msx2 and Runx2 during osteoblast differentiation. *J. Biol. Chem.* **283**, 29119–29125
26. Towler, D.A., Rutledge, S.J., and Rodan, G.A. (1994) Msx-2/Hox 8.1: a transcriptional regulator of the rat osteocalcin promoter. *Mol. Endocrinol.* **8**, 1484–1493
27. Ryoo, H.M., Hoffmann, H.M., Beumer, T., Frenkel, B., Towler, D.A., Stein, G.S., Stein, J.L., van Wijnen, A.J., and Lian, J.B. (1997) Stage-specific expression of Dlx-5 during osteoblast differentiation: involvement in regulation of osteocalcin gene expression. *Mol. Endocrinol.* **11**, 1681–1694
28. Satokata, I., Ma, L., Ohshima, H., Bei, M., Woo, I., Nishizawa, K., Maeda, T., Takano, Y., Uchiyama, M., Heaney, S., Peters, H., Tang, Z., Maxson, R., and Maas, R. (2000) Msx2 deficiency in mice causes pleiotropic defects in bone growth and ectodermal organ formation. *Nat. Genet.* **24**, 391–395
29. Wilkie, A.O., Tang, Z., Elanko, N., Walsh, S., Twigg, S.R., Hurst, J.A., Wall, S.A., Chrzanoska, K.H., and Maxson, R.E. Jr (2000) Functional haploinsufficiency of the human homeobox gene MSX2 causes defects in skull ossification. *Nat. Genet.* **24**, 387–390
30. Wuyts, W., Reardon, W., Preis, S., Homfray, T., Rasore-Quartino, A., Christians, H., Willems, P.J., and Van Hul, W. (2000) Identification of mutations in the MSX2 homeobox gene in families affected with foramina parietalia permagna. *Hum. Mol. Genet.* **9**, 1251–1255
31. Cheng, S.L., Shao, J.S., Charlton-Kachigian, N., Loewy, A.P., and Towler, D.A. (2003) MSX2 promotes osteogenesis and suppresses adipogenic differentiation of multipotent mesenchymal progenitors. *J. Biol. Chem.* **278**, 45969–45977
32. Ichida, F., Nishimura, R., Hata, K., Matsubara, T., Ikeda, F., Hisada, K., Yatani, H., Cao, X., Komori, T., Yamaguchi, A., and Yoneda, T. (2004) Reciprocal roles of MSX2 in regulation of osteoblast and adipocyte differentiation. *J. Biol. Chem.* **279**, 34015–34022

33. Cheng, S.L., Shao, J.S., Cai, J., Sierra, O.L., and Towler, D.A. (2008) Msx2 exerts bone anabolism via canonical Wnt signaling. *J. Biol. Chem.* **283**, 20505–20522
34. Acampora, D., Merlo, G.R., Paleari, L., Zerega, B., Postiglione, M.P., Mantero, S., Bober, E., Barbieri, O., Simeone, A., and Levi, G. (1999) Craniofacial, vestibular and bone defects in mice lacking the Distal-less-related gene *Dlx5*. *Development* **126**, 3795–3809
35. Robledo, R.F. and Lufkin, T. (2006) *Dlx5* and *Dlx6* homeobox genes are required for specification of the mammalian vestibular apparatus. *Genesis* **44**, 425–437
36. Jeong, J., Li, X., McEvilly, R.J., Rosenfeld, M.G., Lufkin, T., and Rubenstein, J.L. (2008) *Dlx* genes pattern mammalian jaw primordium by regulating both lower jaw-specific and upper jaw-specific genetic programs. *Development* **135**, 2905–2916
37. Takase, M., Imamura, T., Sampath, T.K., Takeda, K., Ichijo, H., Miyazono, K., and Kawabata, M. (1998) Induction of *Smad6* mRNA by bone morphogenetic proteins. *Biochem. Biophys. Res. Commun.* **244**, 26–29
38. Murakami, G., Watabe, T., Takaoka, K., Miyazono, K., and Imamura, T. (2003) Cooperative inhibition of bone morphogenetic protein signaling by *Smurf1* and inhibitory Smads. *Mol. Biol. Cell* **14**, 2809–2817
39. Shen, R., Chen, M., Wang, Y.J., Kaneki, H., Xing, L., O'keefe, R.J., and Chen, D. (2006) *Smad6* interacts with *Runx2* and mediates *Smad* ubiquitin regulatory factor 1-induced *Runx2* degradation. *J. Biol. Chem.* **281**, 3569–3576
40. Yamashita, M., Ying, S.X., Zhang, G.M., Li, C., Cheng, S.Y., Deng, C.X., and Zhang, Y.E. (2005) Ubiquitin ligase *Smurf1* controls osteoblast activity and bone homeostasis by targeting *MEKK2* for degradation. *Cell* **121**, 101–113
41. Horiki, M., Imamura, T., Okamoto, M., Hayashi, M., Murai, J., Myoui, A., Ochi, T., Miyazono, K., Yoshikawa, H., and Tsumaki, N. (2004) *Smad6/Smurf1* overexpression in cartilage delays chondrocyte hypertrophy and causes dwarfism with osteopenia. *J. Cell Biol* **165**, 433–445
42. Yoshida, Y., Tanaka, S., Umemori, H., Minowa, O., Usui, M., Ikematsu, N., Hosoda, E., Imamura, T., Kuno, J., Yamashita, T., Miyazono, K., Noda, M., Noda, T., and Yamamoto, T. (2000) Negative regulation of BMP/*Smad* signaling by *Tob* in osteoblasts. *Cell* **103**, 1085–1097
43. Zamurovic, N., Cappellen, D., Rohner, D., and Susa, M. (2004) Coordinated activation of notch, Wnt, and transforming growth factor-beta signaling pathways in bone morphogenetic protein 2-induced osteogenesis. Notch target gene *Hey1* inhibits mineralization and *Runx2* transcriptional activity. *J. Biol. Chem.* **279**, 37704–37715
44. Liu, T., Gao, Y., Sakamoto, K., Minamizato, T., Furukawa, K., Tsukazaki, T., Shibata, Y., Bessho, K., Komori, T., and Yamaguchi, A. (2007) BMP-2 promotes differentiation of osteoblasts and chondroblasts in *Runx2*-deficient cell lines. *J. Cell. Physiol.* **211**, 728–735
45. Minamizato, T., Sakamoto, K., Liu, T., Kokubo, H., Katsube, K., Perbal, B., Nakamura, S., and Yamaguchi, A. (2007) *CCN3/NOV* inhibits BMP-2-induced osteoblast differentiation by interacting with BMP and Notch signaling pathways. *Biochem. Biophys. Res. Commun.* **354**, 567–573
46. Leong, G.M., Subramaniam, N., Figueroa, J., Flanagan, J.L., Hayman, M.J., Eisman, J.A., and Kouzmenko, A.P. (2001) Ski-interacting protein interacts with *Smad* proteins to augment transforming growth factor-beta-dependent transcription. *J. Biol. Chem.* **276**, 18243–18248
47. Leong, G.M., Subramaniam, N., Issa, L.L., Barry, J.B., Kino, T., Driggers, P.H., Hayman, M.J., Eisman, J.A., and Gardiner, E.M. (2004) Ski-interacting protein, a bifunctional nuclear receptor coregulator that interacts with N-CoR/SMRT and p300. *Biochem. Biophys. Res. Commun.* **315**, 1070–1076
48. Kokura, K., Kim, H., Shinagawa, T., Khan, M.M., Nomura, T., and Ishii, S. (2003) The Ski-binding protein C184M negatively regulates tumor growth factor-beta signaling by sequestering the *Smad* proteins in the cytoplasm. *J. Biol. Chem.* **278**, 20133–20139
49. Takeda, M., Mizuide, M., Oka, M., Watabe, T., Inoue, H., Suzuki, H., Fujita, T., Imamura, T., Miyazono, K., and Miyazawa, K. (2004) Interaction with *Smad4* is indispensable for suppression of BMP signaling by c-Ski. *Mol. Biol. Cell* **15**, 963–972
50. Miyazono, K., Maeda, S., and Imamura, T. (2004) Coordinate regulation of cell growth and differentiation by TGF-beta superfamily and *Runx* proteins. *Oncogene* **23**, 4232–4237
51. ten Dijke, P., Miyazono, K., and Heldin, C.H. (2000) Signaling inputs converge on nuclear effectors in TGF-beta signaling. *Trends Biochem. Sci.* **25**, 64–70
52. Centrella, M., Horowitz, M.C., Wozney, J.M., and McCarthy, T.L. (1994) Transforming growth factor-beta gene family members and bone. *Endocr. Rev.* **15**, 27–39
53. Sowa, H., Kaji, H., Yamaguchi, T., Sugimoto, T., and Chihara, K. (2002) *Smad3* promotes alkaline phosphatase activity and mineralization of osteoblastic MC3T3-E1 cells. *J. Bone Miner. Res.* **17**, 1190–1199
54. Maeda, S., Hayashi, M., Komiya, S., Imamura, T., and Miyazono, K. (2004) Endogenous TGF-beta signaling suppresses maturation of osteoblastic mesenchymal cells. *EMBO J.* **23**, 552–563
55. de Gorter, D.J., van Dinther, M., Korchynskiy, O., and ten Dijke, P. (2011) Biphasic effects of transforming growth factor  $\beta^2$  on bone morphogenetic protein-induced osteoblast differentiation. *J. Bone Miner. Res.* **26**, 1178–1187
56. Kang, J.S., Alliston, T., Delston, R., and Derynck, R. (2005) Repression of *Runx2* function by TGF-beta through recruitment of class II histone deacetylases by *Smad3*. *EMBO J.* **24**, 2543–2555
57. Tang, Y., Wu, X., Lei, W., Pang, L., Wan, C., Shi, Z., Zhao, L., Nagy, T.R., Peng, X., Hu, J., Feng, X., Van Hul, W., Wan, M., and Cao, X. (2009) TGF-beta1-induced migration of bone mesenchymal stem cells couples bone resorption with formation. *Nat. Med.* **15**, 757–765
58. Qiu, T., Wu, X., Zhang, F., Clemens, T.L., Wan, M., and Cao, X. (2010) TGF-beta type II receptor phosphorylates PTH receptor to integrate bone remodelling signalling. *Nat. Cell Biol.* **12**, 224–234
59. Foster, J.W., Dominguez-Steglich, M.A., Guioli, S., Kwok, C., Weller, P.A., Stevanovic, M., Weissenbach, J., Mansour, S., Young, I.D., and Goodfellow, P.N. (1994) Campomelic dysplasia and autosomal sex reversal caused by mutations in an SRY-related gene. *Nature* **372**, 525–530
60. Wagner, T., Wirth, J., Meyer, J., Zabel, B., Held, M., Zimmer, J., Pasantes, J., Bricarelli, F.D., Keutel, J., Hustert, E., Wolf, U., Tommerup, N., Schempp, W., and Scherer, G. (1994) Autosomal sex reversal and campomelic dysplasia are caused by mutations in and around the SRY-related gene *SOX9*. *Cell* **79**, 1111–1120

61. Akiyama, H., Chaboissier, M.C., Martin, J.F., Schedl, A., and de Crombrughe, B. (2002) The transcription factor Sox9 has essential roles in successive steps of the chondrocyte differentiation pathway and is required for expression of Sox5 and Sox6. *Genes Dev.* **16**, 2813–2828
62. Takigawa, Y., Hata, K., Muramatsu, S., Amano, K., Ono, K., Wakabayashi, M., Matsuda, A., Takada, K., Nishimura, R., and Yoneda, T. (2010) The transcription factor Znf219 regulates chondrocyte differentiation by assembling a transcription factory with Sox9. *J. Cell Sci.* **123**, 3780–3788
63. Smits, P., Dy, P., Mitra, S., and Lefebvre, V. (2004) Sox5 and Sox6 are needed to develop and maintain source, columnar, and hypertrophic chondrocytes in the cartilage growth plate. *J. Cell Biol.* **164**, 747–758
64. Saito, T., Ikeda, T., Nakamura, K., Chung, U.I., and Kawaguchi, H. (2007) S100A1 and S100B, transcriptional targets of SOX trio, inhibit terminal differentiation of chondrocytes. *EMBO Rep.* **8**, 504–509
65. Muramatsu, S., Wakabayashi, M., Ohno, T., Amano, K., Ooishi, R., Sugahara, T., Shiojiri, S., Tashiro, K., Suzuki, Y., Nishimura, R., Kuhara, S., Sugano, S., Yoneda, T., and Matsuda, A. (2007) Functional gene screening system identified TRPV4 as a regulator of chondrogenic differentiation. *J. Biol. Chem.* **282**, 32158–32167
66. Rock, M.J., Prenen, J., Funari, V.A., Funari, T.L., Merriman, B., Nelson, S.F., Lachman, R.S., Wilcox, W.R., Reyno, S., Quadrelli, R., Vaglio, A., Owsianik, G., Janssens, A., Voets, T., Ikegawa, S., Nagai, T., Rimoin, D.L., Nilus, B., and Cohn, D.H. (2008) Gain-of-function mutations in TRPV4 cause autosomal dominant brachyolmia. *Nat. Genet.* **40**, 999–1003
67. Nishimura, G., Dai, J., Lausch, E., Unger, S., Megarbané, A., Kitoh, H., Kim, O.H., Cho, T.J., Bedeschi, F., Benedicenti, F., Mendoza-Londono, R., Silengo, M., Schmidt-Rimpler, M., Spranger, J., Zabel, B., Ikegawa, S., and Superti-Furga, A. (2010) Spondylo-epiphyseal dysplasia, Maroteaux type (pseudo-Morquio syndrome type 2), and parastremmatic dysplasia are caused by TRPV4 mutations. *Am. J. Med. Genet. A* **152A**, 1443–1449
68. Hata, K., Nishimura, R., Muramatsu, S., Matsuda, A., Matsubara, T., Amano, K., Ikeda, F., Harley, V.R., and Yoneda, T. (2008) Paraspckle protein p54nrb links Sox9-mediated transcription with RNA processing during chondrogenesis in mice. *J. Clin. Invest.* **118**, 3098–3108
69. Amano, K., Hata, K., Muramatsu, S., Wakabayashi, M., Takigawa, Y., Ono, K., Nakanishi, M., Takashima, R., Kogo, M., Matsuda, A., Nishimura, R., and Yoneda, T. (2011) Arid5a cooperates with Sox9 to stimulate chondrocyte-specific transcription. *Mol. Biol. Cell* **22**, 1300–1311
70. Amano, K., Hata, K., Sugita, A., Takigawa, Y., Ono, K., Wakabayashi, M., Kogo, M., Nishimura, R., and Yoneda, T. (2009) Sox9 family members negatively regulate maturation and calcification of chondrocytes through up-regulation of parathyroid hormone-related protein. *Mol. Biol. Cell* **20**, 4541–4551
71. Hattori, T., Müller, C., Gebhard, S., Bauer, E., Pausch, F., Schlund, B., Bösl, M.R., Hess, A., Surmann-Schmitt, C., von der Mark, H., de Crombrughe, B., and von der Mark, K. (2010) SOX9 is a major negative regulator of cartilage vascularization, bone marrow formation and endochondral ossification. *Development* **137**, 901–911
72. Yoshida, C.A., Yamamoto, H., Fujita, T., Furuichi, T., Ito, K., Inoue, K., Yamana, K., Zanma, A., Takada, K., Ito, Y., and Komori, T. (2004) Runx2 and Runx3 are essential for chondrocyte maturation, and Runx2 regulates limb growth through induction of Indian hedgehog. *Genes Dev.* **18**, 952–963
73. Shimoyama, A., Wada, M., Ikeda, F., Hata, K., Matsubara, T., Nifuji, A., Noda, M., Amano, K., Yamaguchi, A., Nishimura, R., and Yoneda, T. (2007) Ihh/Gli2 signaling promotes osteoblast differentiation by regulating Runx2 expression and function. *Mol. Biol. Cell* **18**, 2411–2418
74. Amano, K., Ichida, F., Sugita, A., Hata, K., Wada, M., Takigawa, Y., Nakanishi, M., Kogo, M., Nishimura, R., and Yoneda, T. (2008) MSX2 stimulates chondrocyte maturation by controlling Ihh expression. *J. Biol. Chem.* **283**, 29513–29521
75. Asada, R., Kanemoto, S., Kondo, S., Saito, A., and Imaizumi, K. (2011) The signalling from endoplasmic reticulum-resident bZIP transcription factors involved in diverse cellular physiology. *J. Biochem.* **149**, 507–518
76. Murakami, T., Saito, A., Hino, S., Kondo, S., Kanemoto, S., Chihara, K., Sekiya, H., Tsumagari, K., Ochiai, K., Yoshinaga, K., Saitoh, M., Nishimura, R., Yoneda, T., Kou, I., Furuichi, T., Ikegawa, S., Ikawa, M., Okabe, M., Wanaka, A., and Imaizumi, K. (2009) Signalling mediated by the endoplasmic reticulum stress transducer OASIS is involved in bone formation. *Nat. Cell Biol.* **11**, 1205–1211
77. Saito, A., Hino, S., Murakami, T., Kanemoto, S., Kondo, S., Saitoh, M., Nishimura, R., Yoneda, T., Furuichi, T., Ikegawa, S., Ikawa, M., Okabe, M., and Imaizumi, K. (2009) Regulation of endoplasmic reticulum stress response by a BFF2H7-mediated Sec23a pathway is essential for chondrogenesis. *Nat. Cell Biol.* **11**, 1197–1204
78. Murakami, T., Hino, S., Nishimura, R., Yoneda, T., Wanaka, A., and Imaizumi, K. (2011) Distinct mechanisms are responsible for osteopenia and growth retardation in OASIS-deficient mice. *Bone* **48**, 514–523
